# Supplementary material for: Immortalized murine fibroblast cell lines are refractory to reprogramming to pluripotent state
Source: PubMed Central journal article supplement (PMC6219659; doi:10.18632/oncotarget.26235), 2018-10-16
Supplement: oncotarget-09-35241-s001.pdf [file oncotarget-09-35241-s001.pdf]

## Immortalized murine fibroblast cell lines are refractory to reprogramming to pluripotent state

### SUPPLEMENTARY MATERIALS

#### SUPPLEMENTARY METHODS

##### Preparation of metaphase spreads and chromosome numbers scoring

Metaphase spreads were prepared as described previously [1] with modifications. tKM cells growing at logarithmic phase (cell confluence 60–80%) were treated for 10 hours or overnight with 0.4  $\mu\text{g/ml}$  Colcemid (Wako Pure Chemical) at 37°C in 5%CO<sub>2</sub> incubator. Cells were harvested and incubated in hypotonic 0.56% KCl solution for 20 minutes. Then, cells were fixed by solution of methanol/acetic acid (3:1, v/v), washed, and stored in the fixative solution at –20°C. For metaphase spreads, cells suspension was placed drop wise on

microscope glass slides (Superfrost; Thermo Scientific, Darmstadt, Germany), air-dried, and kept one week at room temperature (RT) on air. Metaphase spreads were stained by Giemsa and scored by phase contrast imaging light microscopy (EVOS FL Auto Imaging System).

#### REFERENCES

1. Liskovych M, Ponomartsev S, Popova E, Bader M, Kouprina N, Larionov V, Alenina N, Tomilin A. Stable maintenance of de novo assembled human artificial chromosomes in embryonic stem cells and their differentiated progeny in mice. *Cell cycle*. 2015; 14:1268–1273.

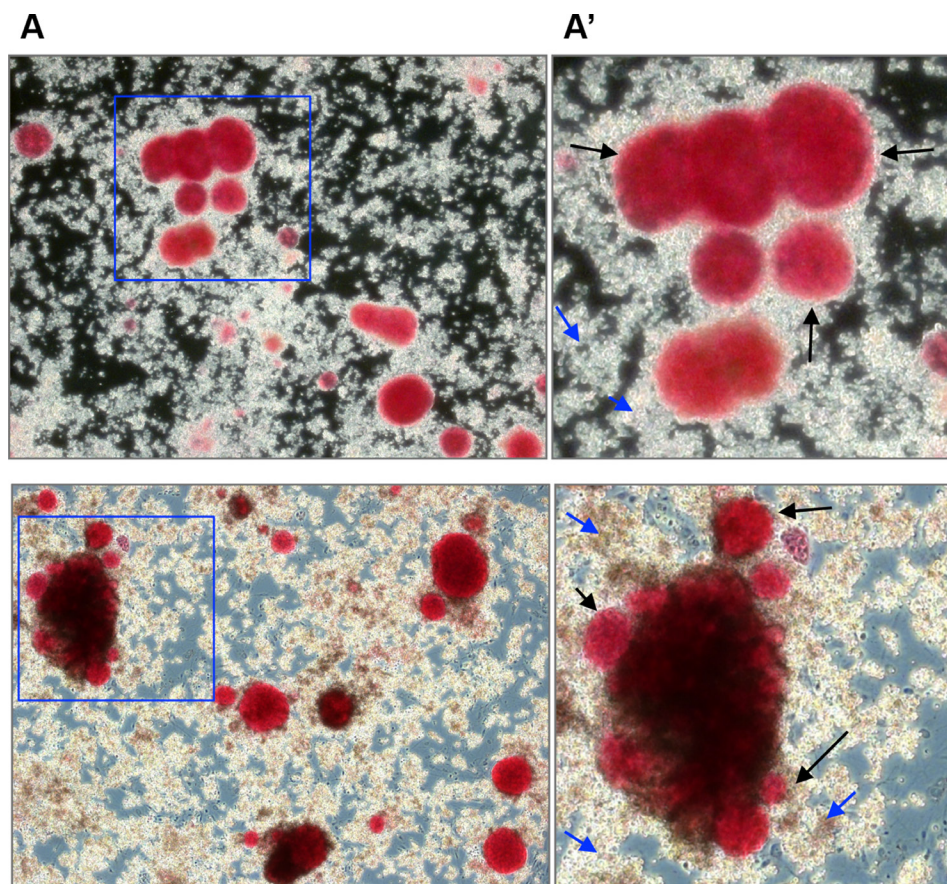

**Supplementary Figure 1: Clusters of MEF-derived iPSC clones generated with OKSM construct.** Representative images of reprogramming cell clones derived from MEFs, presumable sister iPSC clones within the clusters indicated by black arrows. Conglomerates of large round-shaped “intermediate” cells indicated by blue arrows. Magnification 10x (A) and 40x (A’) indicated on images.

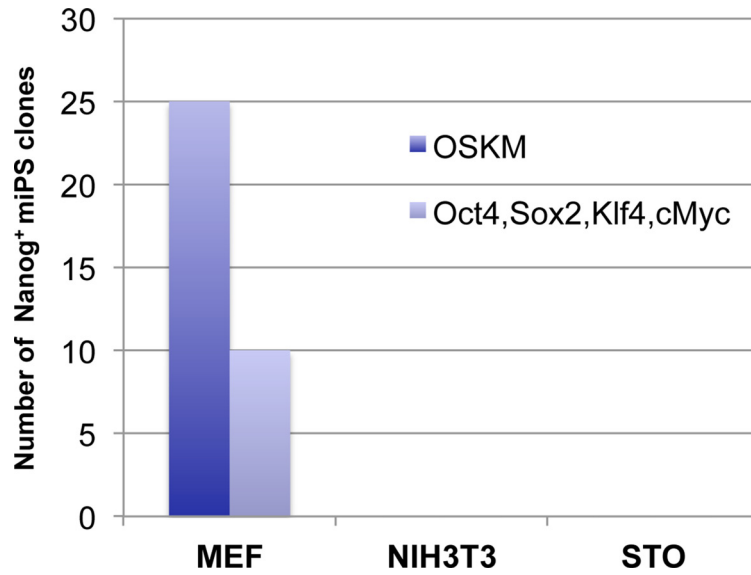

**Supplementary Figure 2: NIH3T3 and STO cells could not be reprogrammed into iPSCs with the use of OSKM or mixture of single constructs of reprogramming factors.** MEFs are efficiently reprogrammed by OSKM vector or by mixture of single constructs encoding the reprogramming factors. In contrast NIH3T3 and STO cells could not be reprogrammed to iPSCs by these constructs.

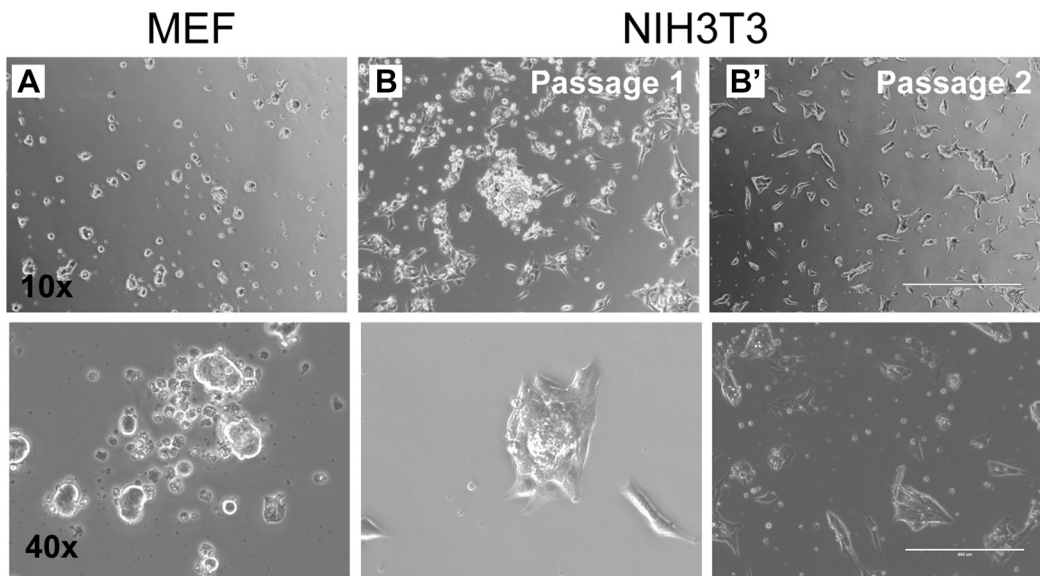

**Supplementary Figure 3: Lack of iPSC maintenance of NIH-3T3-derived clone.** Representative images of reprogramming cell clones derived from NIH-3T3 cells after 1st (B) and 2nd (B') passages in compare with iPSC clones derived from MEFs (A). Magnification 10x and 40x indicated on images.

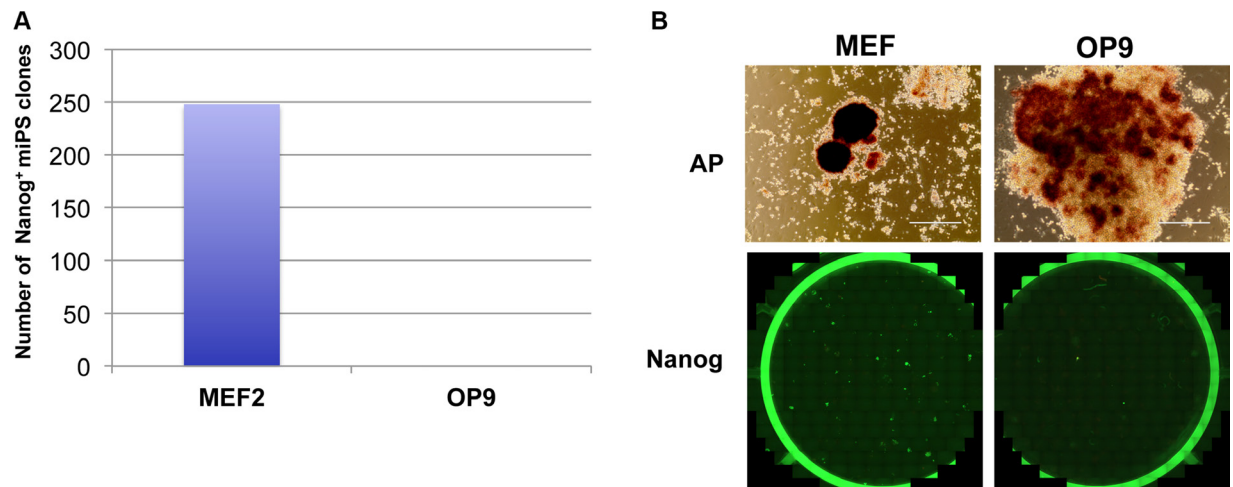

**Supplementary Figure 4:** (A) OP9 cell line could not be reprogrammed into iPSCs by OKSM as seen by absence of Nanog positive clones. (B) Representative view of cell colonies derived from MEFs and OP9 cells stained for alkaline phosphatase (10x magnification). Representative view culture wells containing Nanog-positive iPSC colonies (green) derived from MEFs, and lack of Nanog-positive colonies derived from OP9 cells (two green out of focus dots are pseudo signals, 2x magnification).

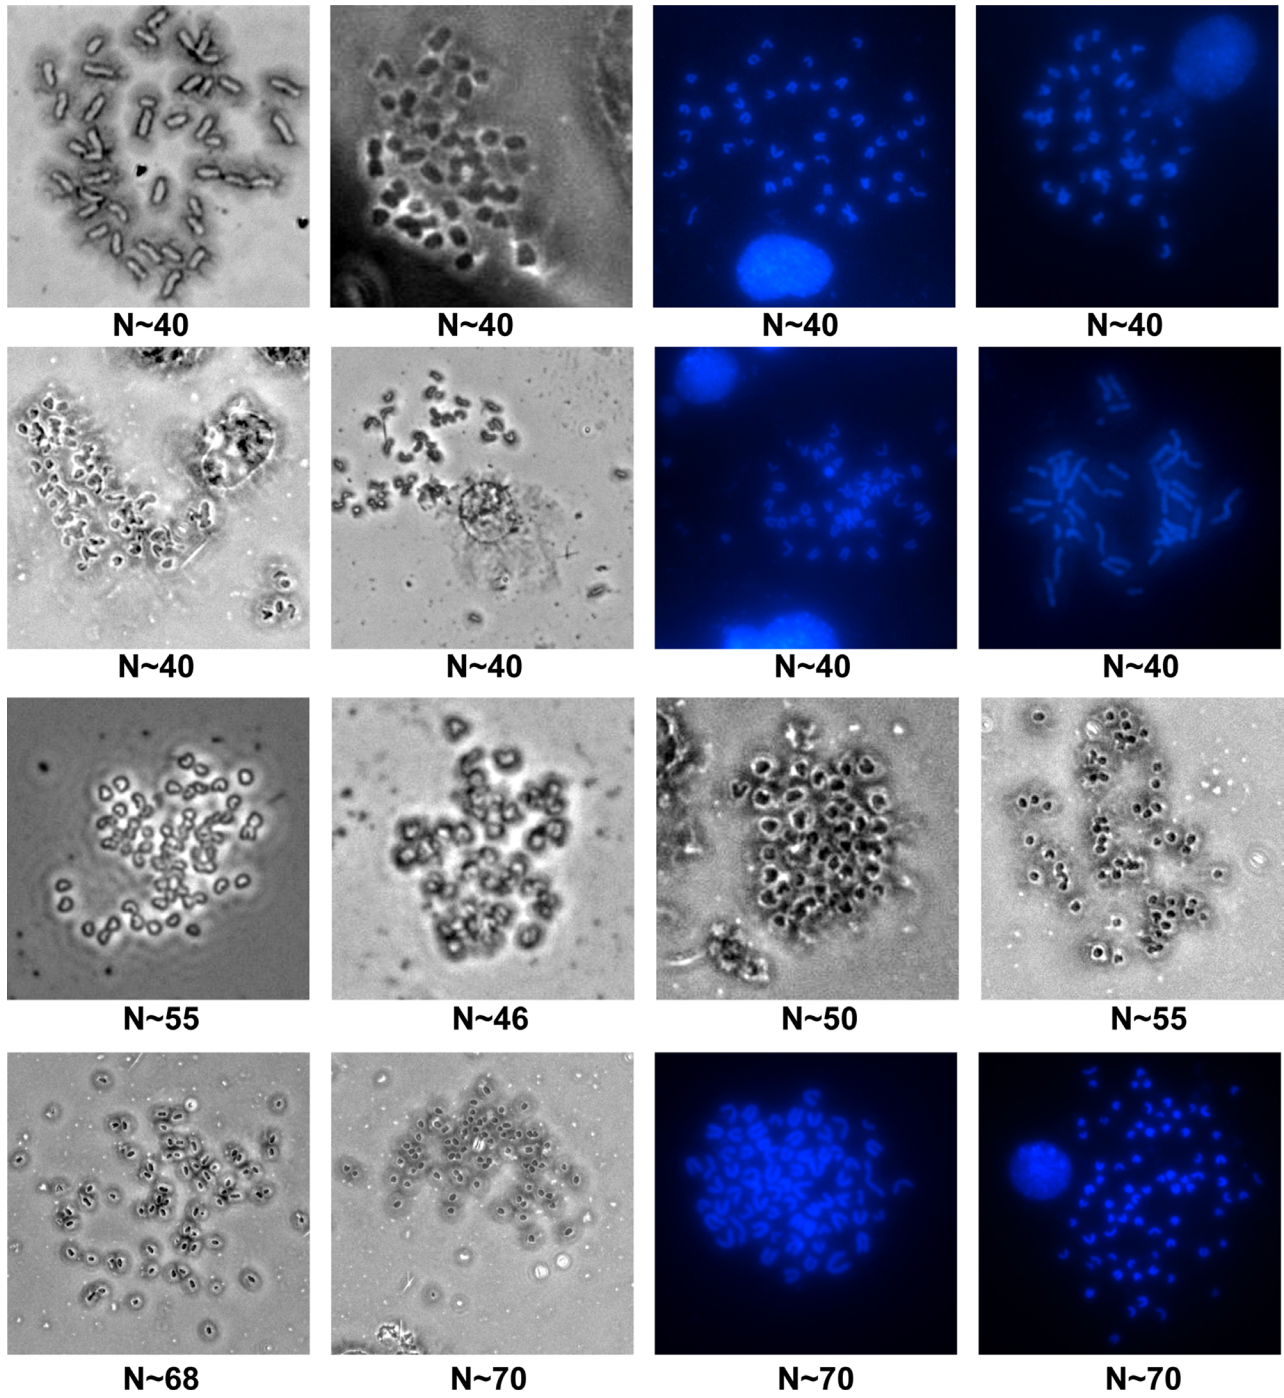

**Supplementary Figure 5: Phase contrast images of metaphase nucleus spreads of tKM cells stained by Giemsa or DAPI. Numbers of chromosomes per metaphase nuclei indicated below images.**

**Supplementary Table 1: Cell and clone counts in reprogramming of various fibroblast lines by OKSM**

| Parent cell line | Day 0                                  |                                        | Day 3                                              |                                       | Day 14                   |     | Average numbers of Nanog positive clones |
|------------------|----------------------------------------|----------------------------------------|----------------------------------------------------|---------------------------------------|--------------------------|-----|------------------------------------------|
|                  | Cell count per plate, $\times 10^{-3}$ | Cell count per plate, $\times 10^{-3}$ | Cell count per plate at transfer, $\times 10^{-3}$ | Average numbers of AP positive clones |                          |     |                                          |
|                  |                                        |                                        |                                                    | Compact clones per plate              | Diffuse clones per plate |     |                                          |
| MEF              | 50                                     | 168                                    | 56                                                 | 110                                   | 10                       | 181 |                                          |
|                  |                                        |                                        | 56                                                 | 80                                    | 27                       | 145 |                                          |
|                  |                                        |                                        | 56                                                 | 105                                   | 10                       | 125 |                                          |
| NIH/3T3          | 50                                     | 375                                    | 125                                                | 61                                    | 50                       | 0   |                                          |
|                  |                                        |                                        | 125                                                | 55                                    | 61                       | 0   |                                          |
|                  |                                        |                                        | 125                                                | 20                                    | 70                       | 0   |                                          |
| STO              | 50                                     | 420                                    | 140                                                | 10                                    | 52                       | 0   |                                          |
|                  |                                        |                                        | 140                                                | 5                                     | 20                       | 0   |                                          |
|                  |                                        |                                        | 140                                                | 5                                     | 37                       | 0   |                                          |
| tKM              | 50                                     | 435                                    | 145                                                | 5                                     | 13                       | 0   |                                          |
|                  |                                        |                                        | 145                                                | 0                                     | 10                       | 0   |                                          |
|                  |                                        |                                        | 145                                                | 3                                     | 10                       | 0   |                                          |

**Supplementary Table 2: Chromosome counts in tKM cells**

| Chromosome numbers in tKM cells | Nuclei counts |
|---------------------------------|---------------|
| N~40                            | 23            |
| N~60-75                         | 11            |
| N~30-36                         | 3             |
| N~46-55                         | 4             |
